# Supplementary material for: Estimation of Knee Joint Forces in Sport Movements Using Wearable Sensors and Machine Learning
Source: MDPI journal article supplement (doi:10.3390/s19173690), 2019-08-25
Supplement: s1 [file s1]

### Supplementary Figures: Knee joint forces (KJF) time series of all movements

$r$ : Pearson's correlation coefficient;  $rRMSE$ : relative root-mean-squared error; OLJ: one-leg jump; TLJ: two-leg jump; mean (standard deviation)

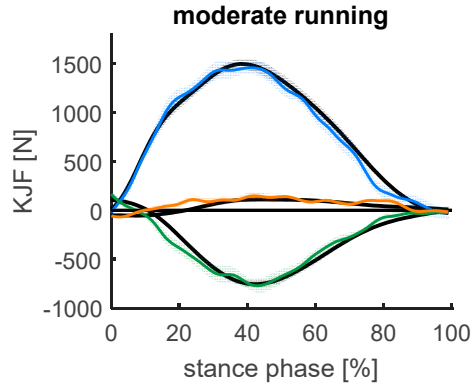

—  $F_v$ ,  $F_{ap}$  and  $F_{mi}$   
 —  $F_v^*$ ;  $r = 0.94$  (0.33),  $rRMSE = 14.2\%$  (4.0%)  
 —  $F_{ap}^*$ ;  $r = 0.90$  (0.30),  $rRMSE = 18.9\%$  (5.5%)  
 —  $F_{mi}^*$ ;  $r = 0.43$  (0.26),  $rRMSE = 41.7\%$  (11.5%)

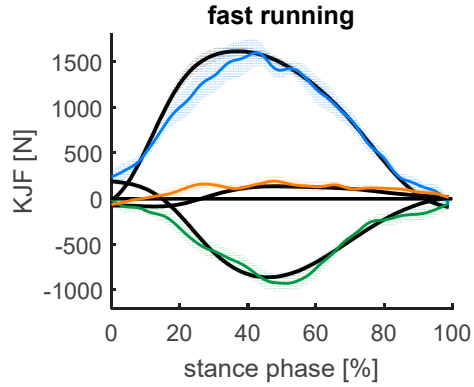

—  $F_v$ ,  $F_{ap}$  and  $F_{mi}$   
 —  $F_v^*$ ;  $r = 0.89$  (0.43),  $rRMSE = 20.3\%$  (5.8%)  
 —  $F_{ap}^*$ ;  $r = 0.88$  (0.44),  $rRMSE = 22.9\%$  (9.5%)  
 —  $F_{mi}^*$ ;  $r = 0.42$  (0.41),  $rRMSE = 43.3\%$  (12.0%)

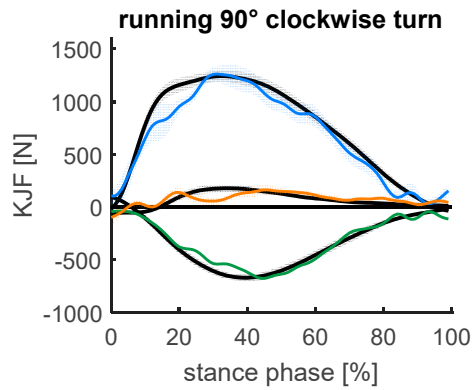

—  $F_v$ ,  $F_{ap}$  and  $F_{mi}$   
 —  $F_v^*$ ;  $r = 0.89$  (0.35),  $rRMSE = 17.2\%$  (4.4%)  
 —  $F_{ap}^*$ ;  $r = 0.82$  (0.36),  $rRMSE = 21.0\%$  (6.5%)  
 —  $F_{mi}^*$ ;  $r = 0.38$  (0.35),  $rRMSE = 36.6\%$  (18.4%)

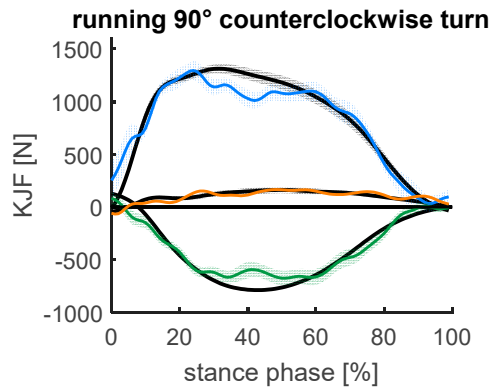

—  $F_v$ ,  $F_{ap}$  and  $F_{mi}$   
 —  $F_v^*$ ;  $r = 0.87$  (0.40),  $rRMSE = 17.5\%$  (5.3%)  
 —  $F_{ap}^*$ ;  $r = 0.88$  (0.43),  $rRMSE = 19.5\%$  (8.1%)  
 —  $F_{mi}^*$ ;  $r = 0.37$  (0.42),  $rRMSE = 37.2\%$  (11.5%)

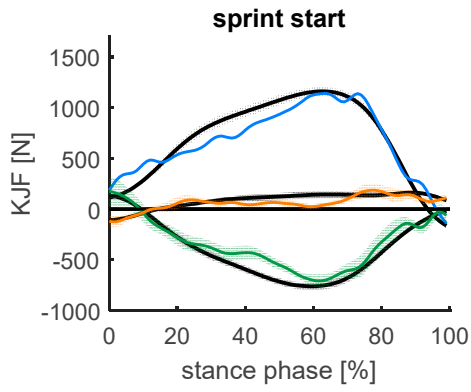

—  $F_v$ ,  $F_{ap}$  and  $F_{ml}$   
 —  $F_v^*$ ;  $r = 0.73$  (0.45),  $rRMSE = 25.9\%$  (8.8%)  
 —  $F_{ap}^*$ ;  $r = 0.76$  (0.40),  $rRMSE = 25.8\%$  (9.3%)  
 —  $F_{ml}^*$ ;  $r = 0.31$  (0.29),  $rRMSE = 43.3\%$  (10.0%)

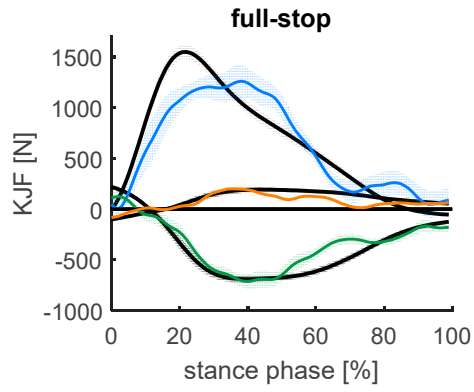

—  $F_v$ ,  $F_{ap}$  and  $F_{ml}$   
 —  $F_v^*$ ;  $r = 0.78$  (0.45),  $rRMSE = 24.7\%$  (7.2%)  
 —  $F_{ap}^*$ ;  $r = 0.80$  (0.34),  $rRMSE = 21.8\%$  (7.5%)  
 —  $F_{ml}^*$ ;  $r = 0.45$  (0.29),  $rRMSE = 37.7\%$  (9.0%)

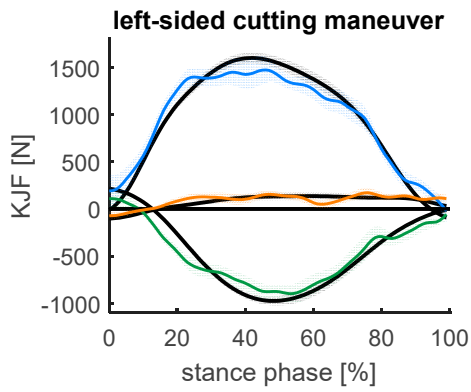

—  $F_v$ ,  $F_{ap}$  and  $F_{ml}$   
 —  $F_v^*$ ;  $r = 0.86$  (0.44),  $rRMSE = 19.4\%$  (6.6%)  
 —  $F_{ap}^*$ ;  $r = 0.86$  (0.41),  $rRMSE = 22.0\%$  (7.3%)  
 —  $F_{ml}^*$ ;  $r = 0.30$  (0.42),  $rRMSE = 44.8\%$  (13.0%)

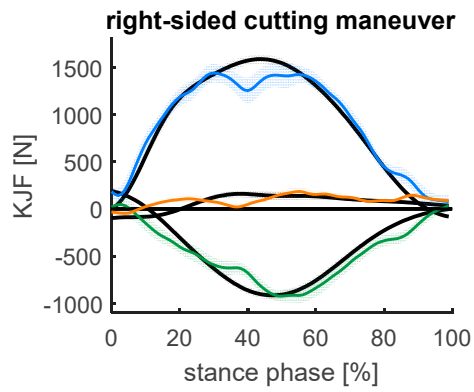

—  $F_v$ ,  $F_{ap}$  and  $F_{ml}$   
 —  $F_v^*$ ;  $r = 0.86$  (0.39),  $rRMSE = 19.0\%$  (5.4%)  
 —  $F_{ap}^*$ ;  $r = 0.84$  (0.35),  $rRMSE = 21.4\%$  (5.2%)  
 —  $F_{ml}^*$ ;  $r = 0.25$  (0.39),  $rRMSE = 45.7\%$  (9.0%)

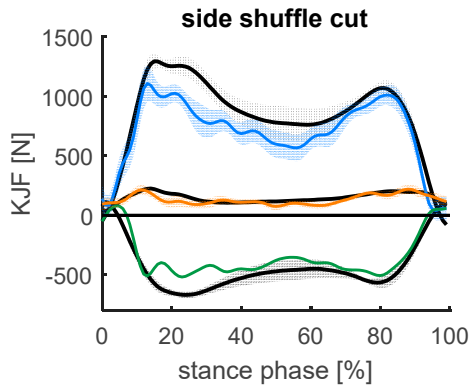

—  $F_v$ ,  $F_{ap}$  and  $F_{ml}$   
 —  $F_v^*$ ;  $r = 0.79$  (0.47),  $rRMSE = 20.3\%$  (6.6%)  
 —  $F_{ap}^*$ ;  $r = 0.81$  (0.43),  $rRMSE = 19.8\%$  (5.9%)  
 —  $F_{ml}^*$ ;  $r = 0.35$  (0.45),  $rRMSE = 36.5\%$  (9.3%)

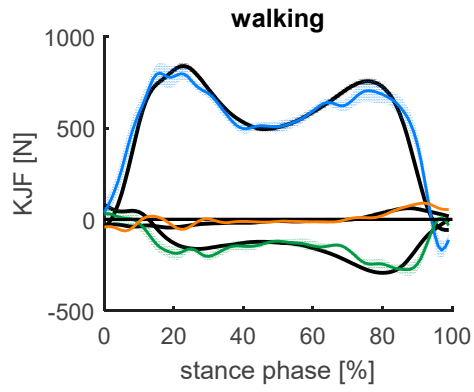

—  $F_v$ ,  $F_{ap}$  and  $F_{ml}$   
 —  $F_v^*$ ;  $r = 0.87$  (0.32),  $rRMSE = 14.2\%$  (4.3%)  
 —  $F_{ap}^*$ ;  $r = 0.71$  (0.39),  $rRMSE = 20.8\%$  (5.6%)  
 —  $F_{ml}^*$ ;  $r = 0.60$  (0.31),  $rRMSE = 27.7\%$  (5.7%)

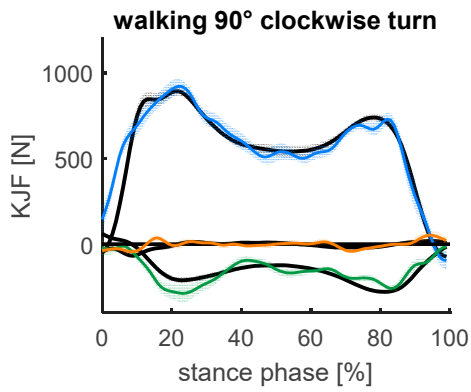

—  $F_v$ ,  $F_{ap}$  and  $F_{ml}$   
 —  $F_v^*$ ;  $r = 0.81$  (0.27),  $rRMSE = 16.9\%$  (4.5%)  
 —  $F_{ap}^*$ ;  $r = 0.65$  (0.31),  $rRMSE = 23.0\%$  (6.2%)  
 —  $F_{ml}^*$ ;  $r = 0.31$  (0.20),  $rRMSE = 34.1\%$  (8.1%)

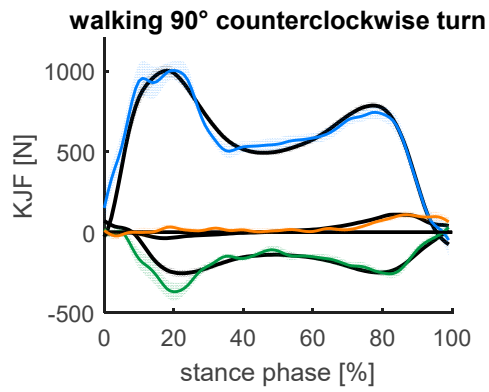

—  $F_v$ ,  $F_{ap}$  and  $F_{ml}$   
 —  $F_v^*$ ;  $r = 0.83$  (0.29),  $rRMSE = 15.3\%$  (4.0%)  
 —  $F_{ap}^*$ ;  $r = 0.64$  (0.30),  $rRMSE = 22.7\%$  (5.8%)  
 —  $F_{ml}^*$ ;  $r = 0.48$  (0.34),  $rRMSE = 29.1\%$  (6.0%)

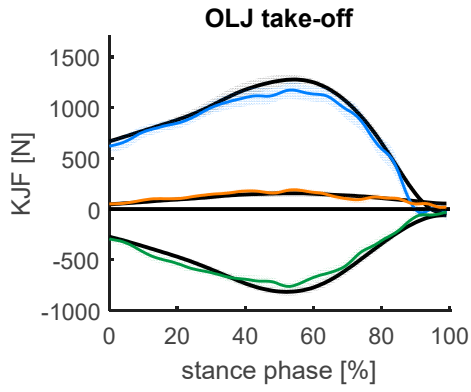

—  $F_v$ ,  $F_{ap}$  and  $F_{ml}$   
 —  $F_v^*$ ;  $r = 0.92$  (0.39),  $rRMSE = 15.4\%$  (6.6%)  
 —  $F_{ap}^*$ ;  $r = 0.89$  (0.25),  $rRMSE = 17.4\%$  (5.5%)  
 —  $F_{ml}^*$ ;  $r = 0.31$  (0.46),  $rRMSE = 45.9\%$  (19.7%)

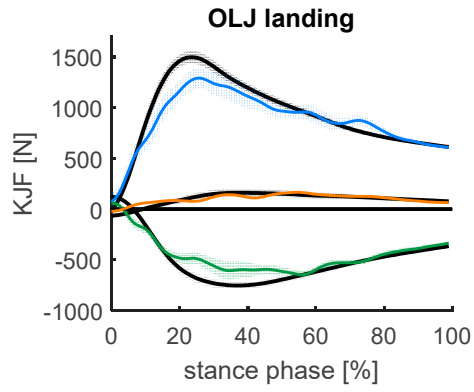

—  $F_v$ ,  $F_{ap}$  and  $F_{ml}$   
 —  $F_v^*$ ;  $r = 0.84$  (0.43),  $rRMSE = 16.7\%$  (7.2%)  
 —  $F_{ap}^*$ ;  $r = 0.77$  (0.53),  $rRMSE = 25.1\%$  (9.4%)  
 —  $F_{ml}^*$ ;  $r = 0.42$  (0.38),  $rRMSE = 39.0\%$  (14.4%)

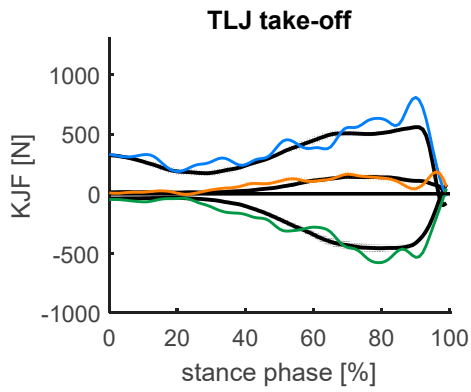

—  $F_v$ ,  $F_{ap}$  and  $F_{ml}$   
 —  $F_v^*$ ;  $r = 0.60$  (0.36),  $rRMSE = 23.0\%$  (8.6%)  
 —  $F_{ap}^*$ ;  $r = 0.82$  (0.40),  $rRMSE = 20.5\%$  (7.4%)  
 —  $F_{ml}^*$ ;  $r = 0.51$  (0.23),  $rRMSE = 27.8\%$  (2.9%)

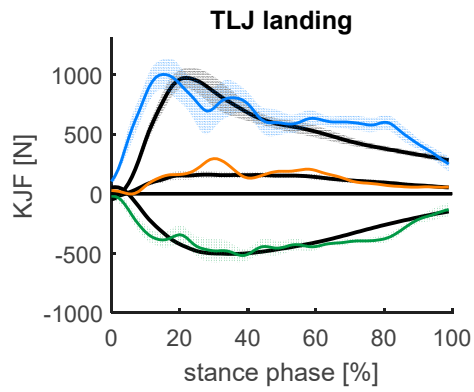

—  $F_v$ ,  $F_{ap}$  and  $F_{ml}$   
 —  $F_v^*$ ;  $r = 0.61$  (0.34),  $rRMSE = 25.9\%$  (6.2%)  
 —  $F_{ap}^*$ ;  $r = 0.65$  (0.36),  $rRMSE = 27.1\%$  (5.5%)  
 —  $F_{ml}^*$ ;  $r = 0.54$  (0.32),  $rRMSE = 37.6\%$  (6.8%)
